# Supplementary material
Source: Elsevier journal article supplement (https://www.sciencedirect.com/science/article/pii/S2387020615003666)
Supplement: mmc1 [file S2387020615003666:mmc1.pdf]

Figura (suplemento on line)

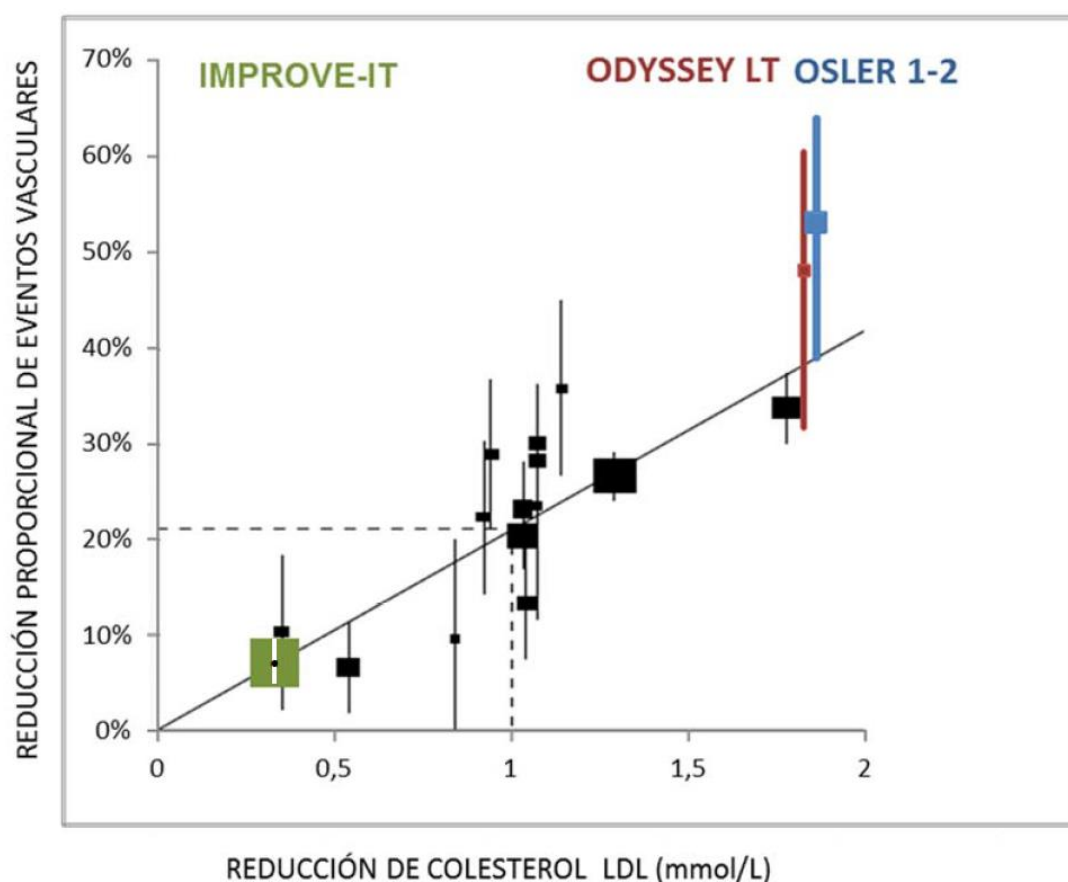

Relación entre la reducción proporcional de la incidencia de eventos vasculares graves y la media de la reducción absoluta de colesterol LDL en los ensayos clínicos con estatinas (Adaptado de Referencia 3 y 18). Sobre la gráfica inicial que incorpora los estudios con estatinas se han representado los resultados equivalentes de los recientes estudios IMPROVE-IT (referencia 18), ODYSSEY-LT (referencia 29) y OSLER 1-2 (referencia 28)

Cada ensayo se representa con un cuadrado de tamaño proporcional al número de pacientes, la reducción media de colesterol LDL en abscisas y la reducción proporcional de eventos vasculares alcanzada en ordenadas. Las líneas verticales corresponden al error estándar de la reducción de tasa de eventos vasculares en cada estudio. Como puede apreciarse, los resultados de los nuevos ensayos (en color) muestran que los beneficios de prevención cardiovascular obtenidos mediante inhibición de la absorción o anti PCSK9 se alinean de acuerdo con la recta de regresión obtenida con los estudios de las estatinas (en negro). En otras palabras, el efecto protector del tratamiento hipolipemiante depende fundamentalmente de la magnitud del descenso del colesterol LDL, con independencia del fármaco empleado para el descenso, para niveles de reducción de colesterol LDL equivalentes
